# Supplementary material
Source: Springer Nature journal article supplement (https://www.springermedizin.de/resource/supplementary/12943_2004_80_MOESM2_ESM.pdf/9553390)
Supplement: MOESM2 [file 9553390]

Ptch1 null MEF cells

Ptch1 null MEF cells  
transfected with PTCH1

1A

DAPI

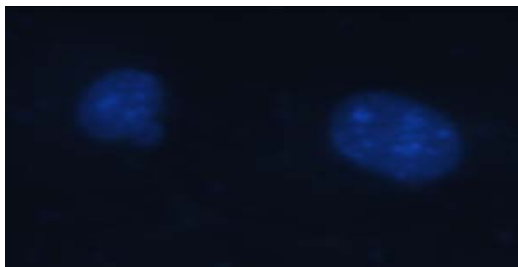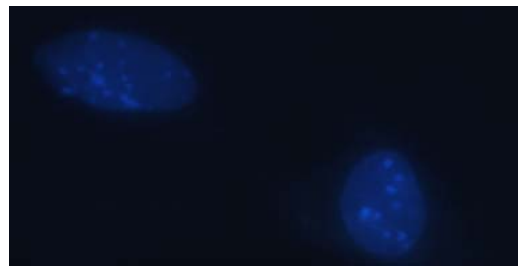

PTCH1

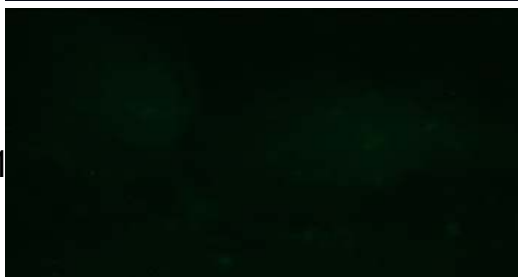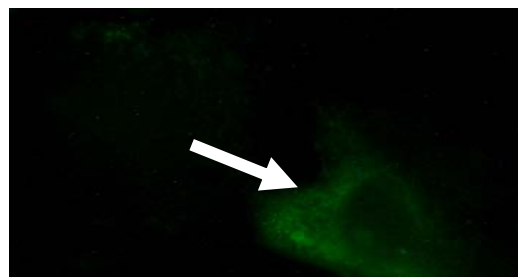

1B

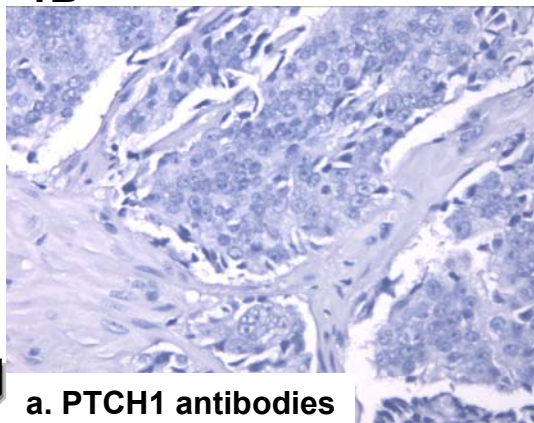

a. PTCH1 antibodies

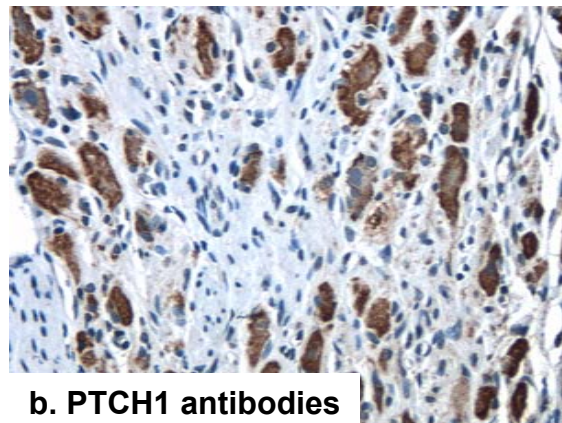

b. PTCH1 antibodies

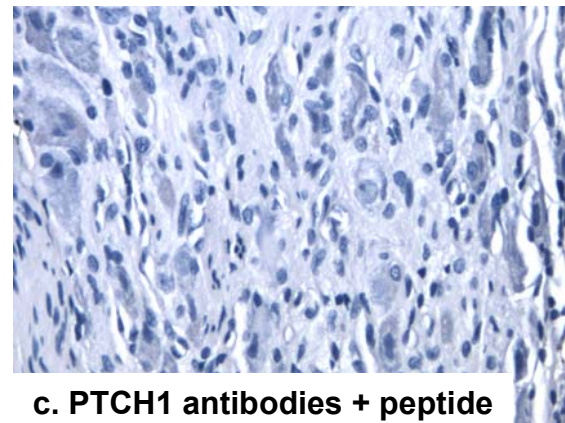

c. PTCH1 antibodies + peptide
